# Supplementary material for: Disproportionation-induced solid-state fluorescence in 6,13-dihydropentacenes
Source: Royal Society of Chemistry journal article supplement (doi:10.1039/c9ra03297e), 2019-01-01
Supplement: c9ra03297e1.pdf [file c9ra03297e1.pdf]

## Supporting Information

# Disproportionation-induced solid-state fluorescence in 6,13-dihdropentacenes

Tomoyuki Tajima,<sup>\*a</sup> Rai Sanda,<sup>a</sup> Katsuya Nishihara,<sup>a</sup> Hitoshi Shirai,<sup>a</sup> Yasuhiro Okuda,<sup>b</sup> Akihiro Orita,<sup>b</sup>  
and Yutaka Takaguchi<sup>\*a</sup>

<sup>a</sup>Graduate School of Environmental Science, Okayama University, Tsushima-Naka 2-1-1, Kita-ku,  
Okayama 700-8530, Japan

<sup>b</sup>*Department of Applied Chemistry and Biotechnology, Okayama University of Science, 1-1 Ridai-cho,  
Kita-ku, Okayama 700-0005, Japan*

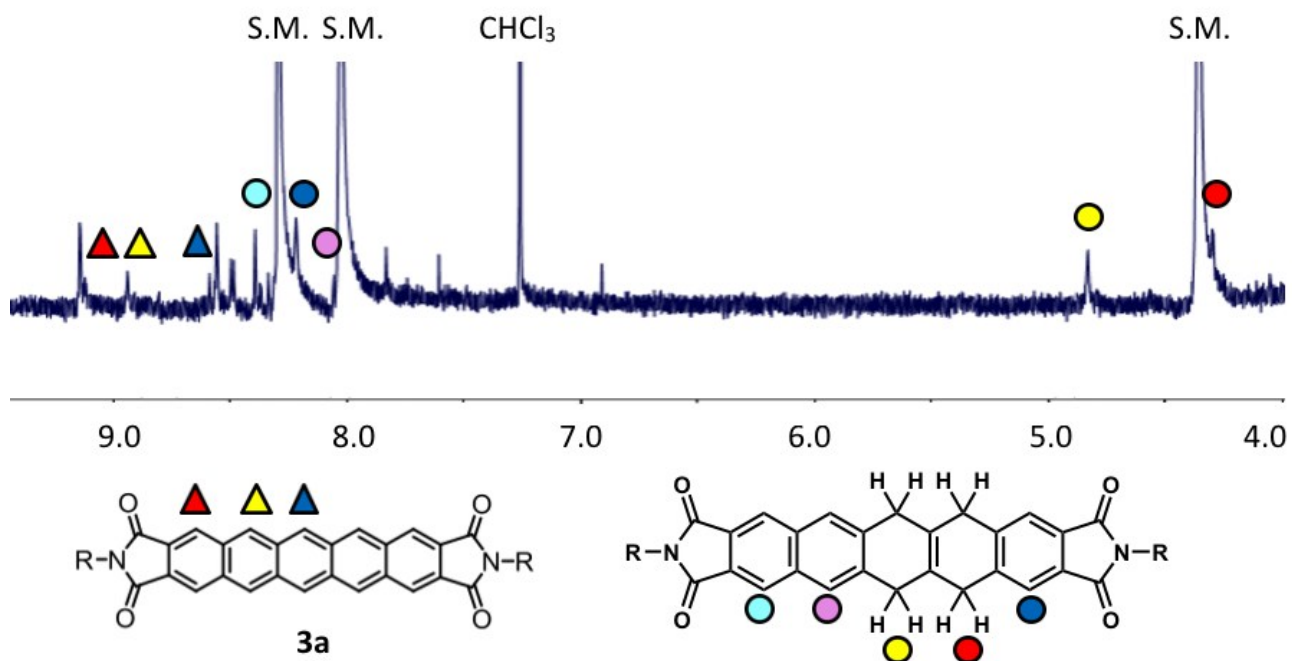

**Fig. S1.** <sup>1</sup>H NMR spectrum of **3a** after heating at 250 °C.

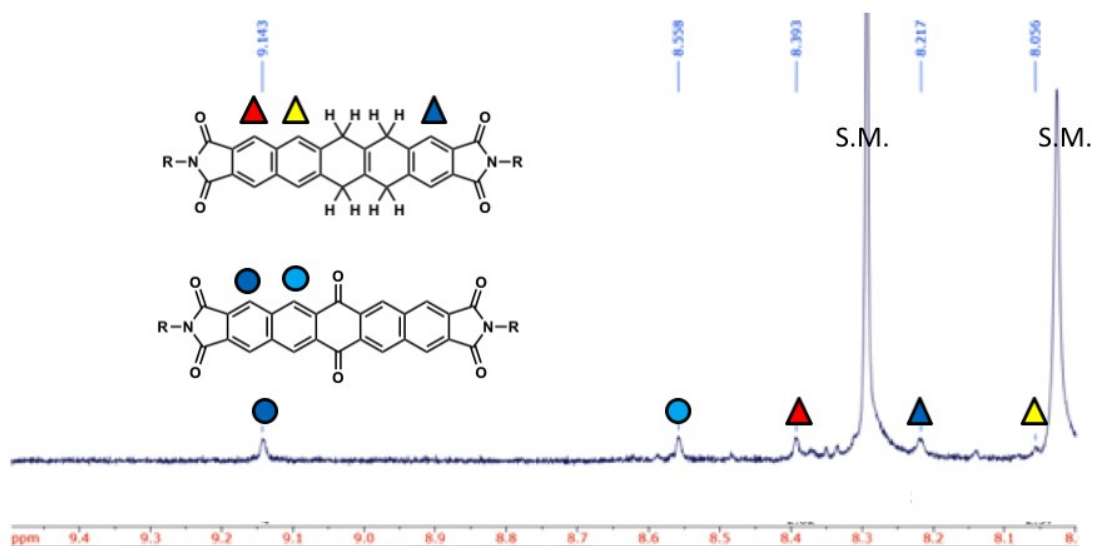

**Fig. S2.** <sup>1</sup>H NMR spectrum of **3a** after heating at 250 °C upon exposure to air.

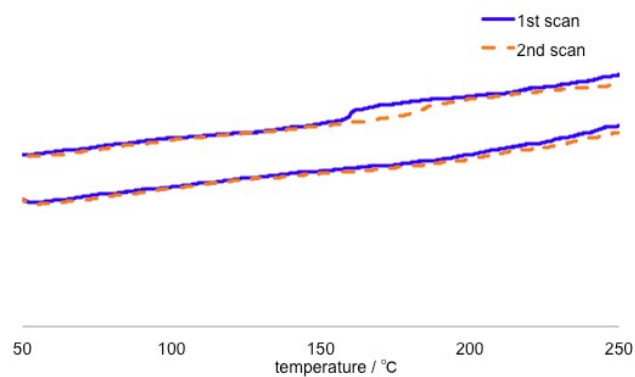

**Fig. S3.** The differential scanning calorimetry (DSC) measurement of **3a** (scan rate = 10 °C/min).

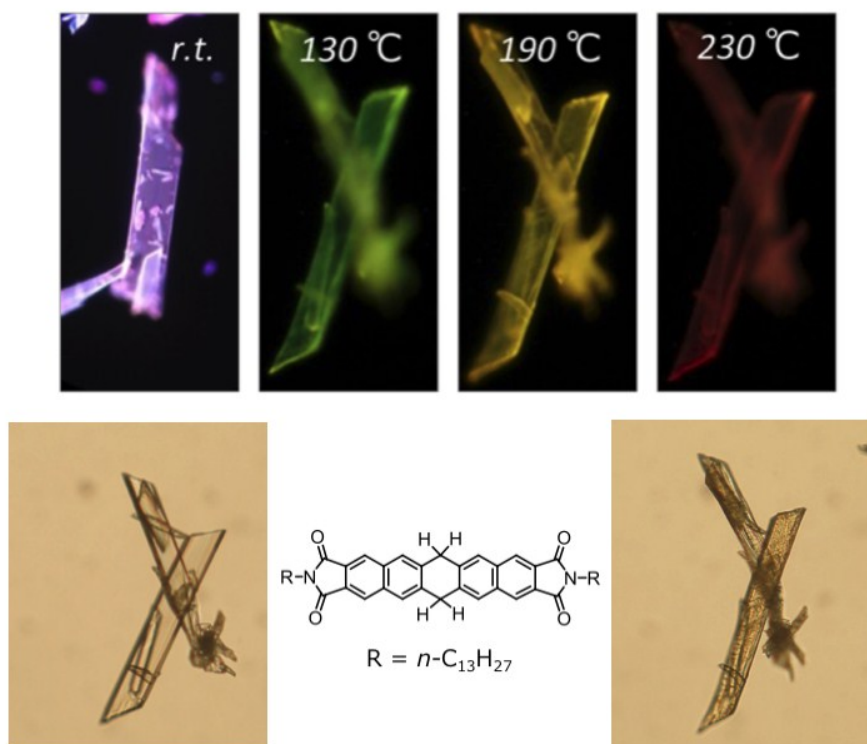

**Fig. S4.** Apparent fluorescence color change of a **3b** with the increasing temperature and polarized optical microscopy images of **3b**.

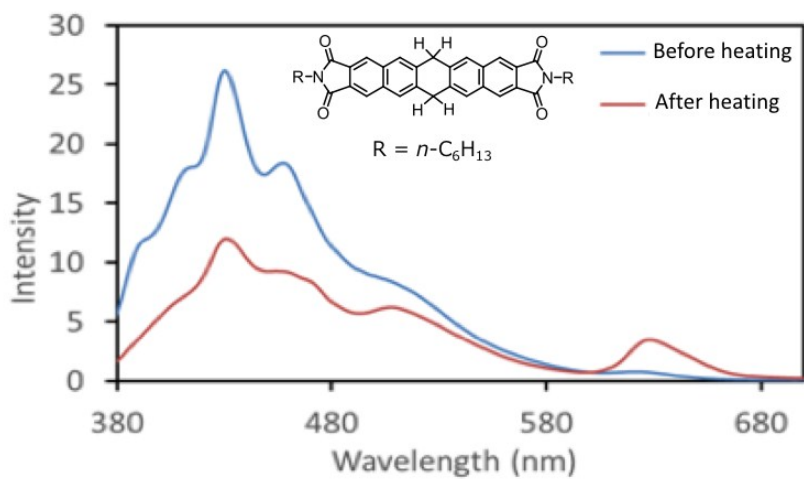

**Fig. S5.** Fluorescence spectra of a thin film of **3a** with increasing temperature.

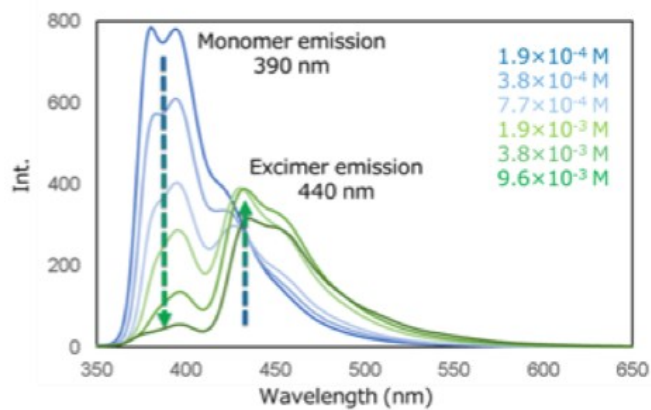

**Fig. S6.** Fluorescence spectra of **3a** in  $\text{CHCl}_3$  solution as function of concentration ( $\lambda_{\text{ex}} = 275$  nm).

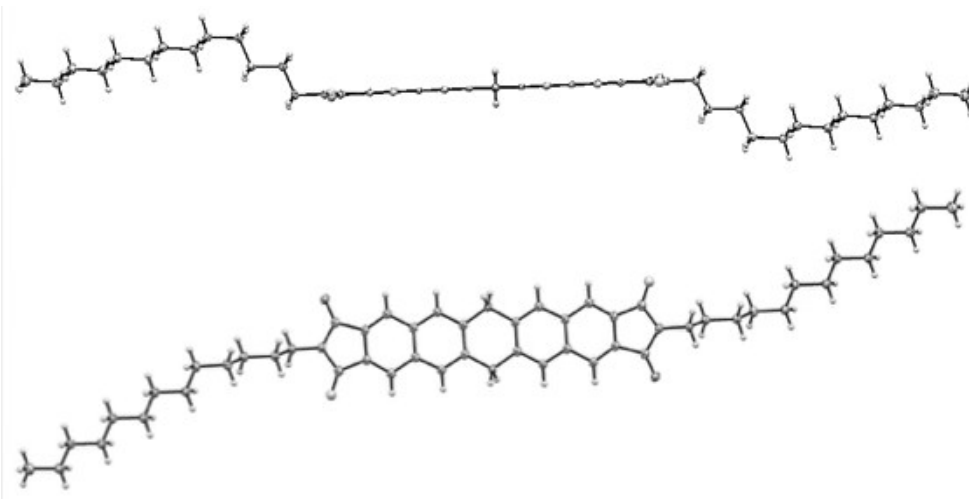

**Fig. S7.** ORTEP drawings of **3b** (thermal ellipsoids at 50% probability).

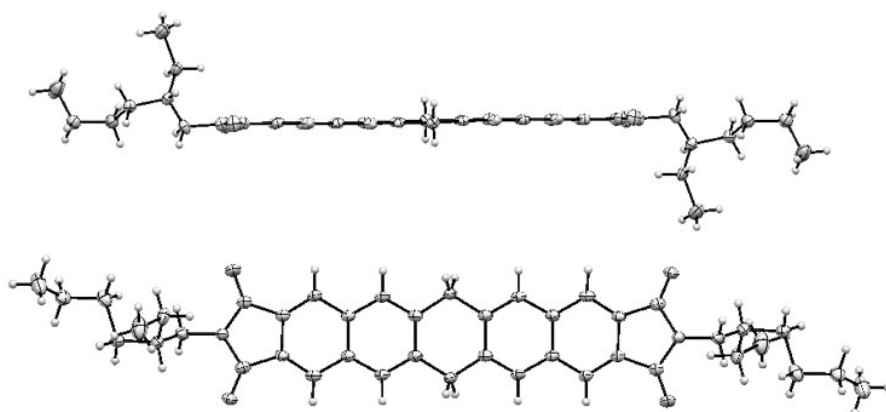

**Fig. S8.** ORTEP drawings of **3c** (thermal ellipsoids at 50% probability).

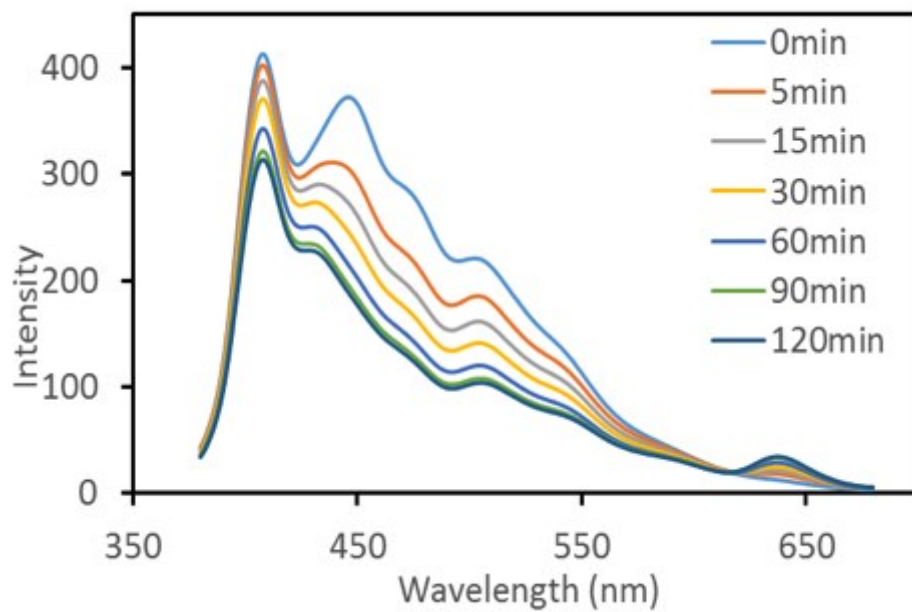

**Fig. S9.** Fluorescence spectra of solid of **3b** upon photoirradiation ( $\lambda_{\text{ex}} > 300$  nm).

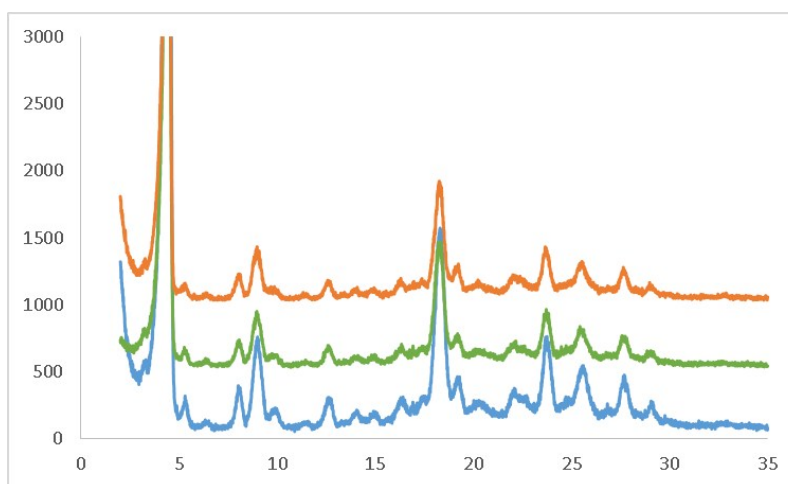

**Fig. S10.** XRD pattern of **3a** after annealing at 230 °C (orange line), at 230 °C (green line), and before annealing (blue line).

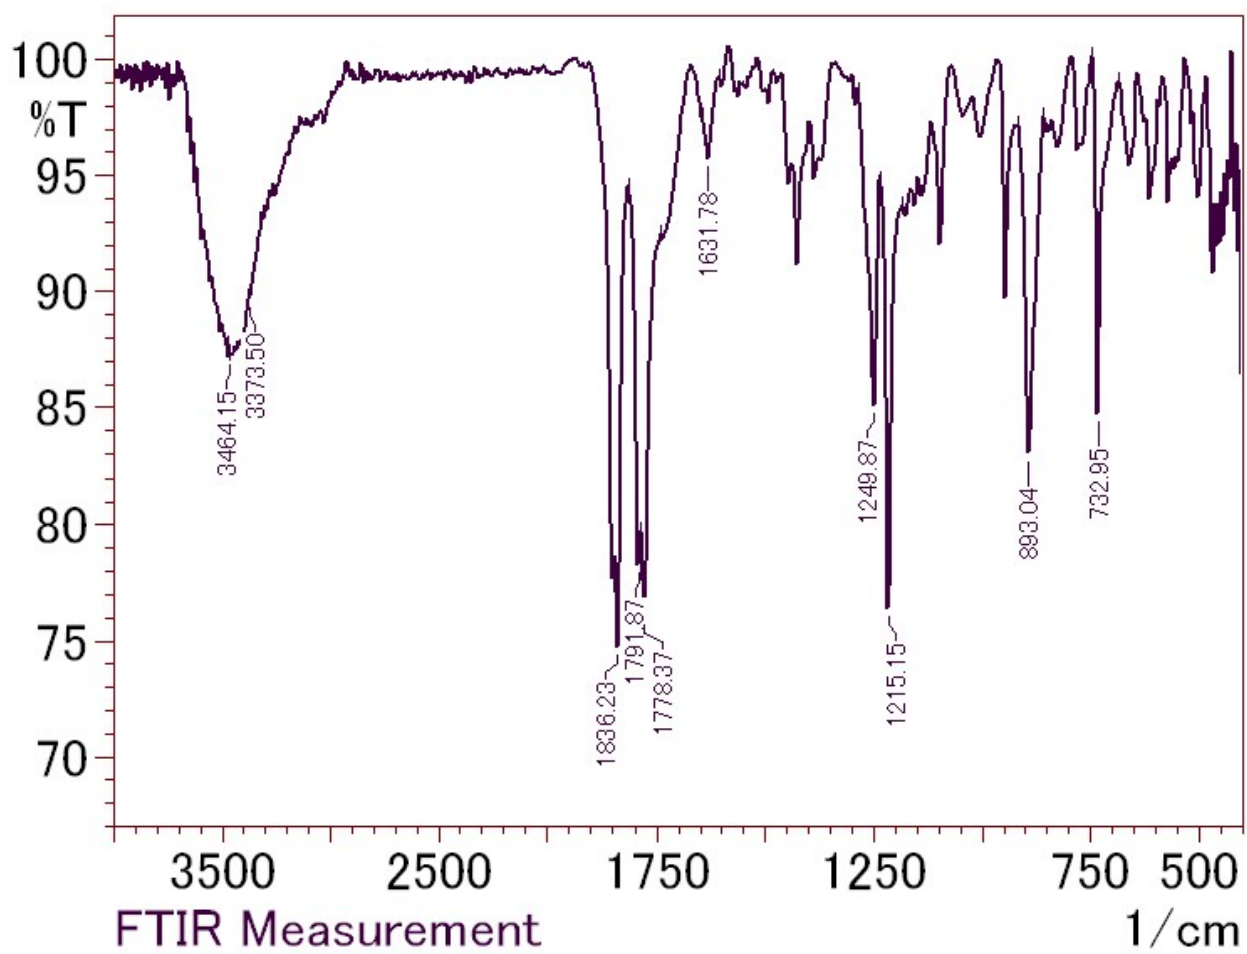

Fig. S11. FT-IR spectrum of 2.

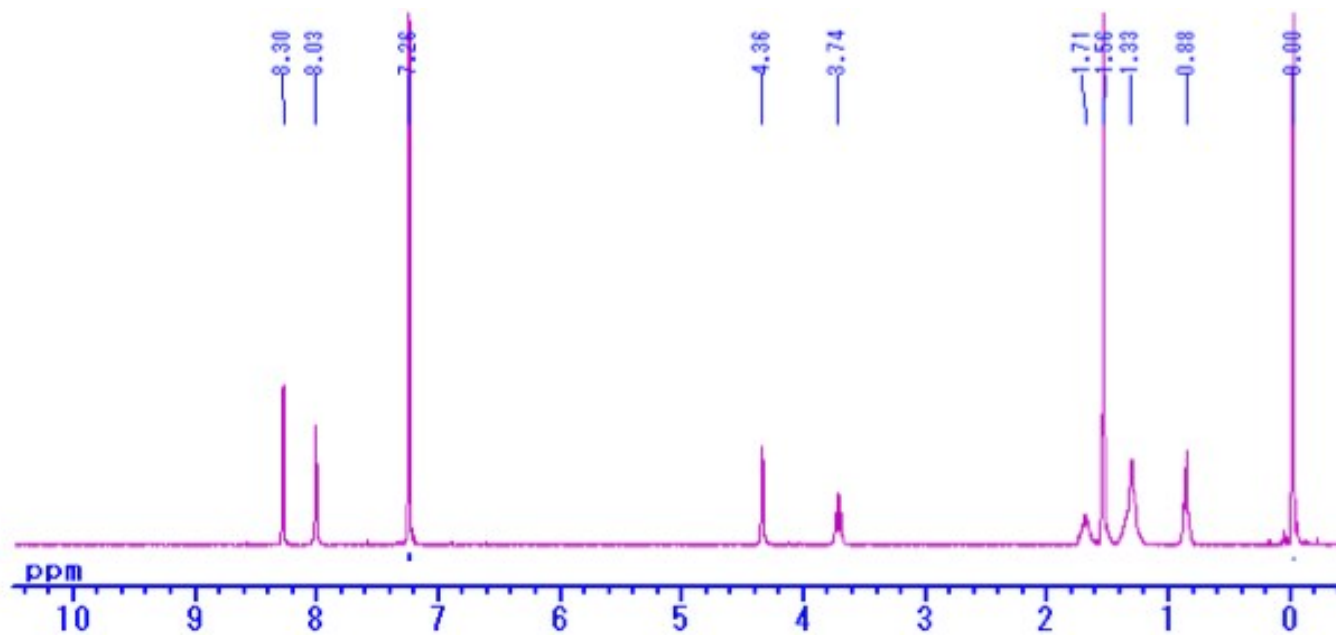

**Fig. S12.**  $^1\text{H}$  NMR spectrum of **3a** in  $\text{CDCl}_3$ .

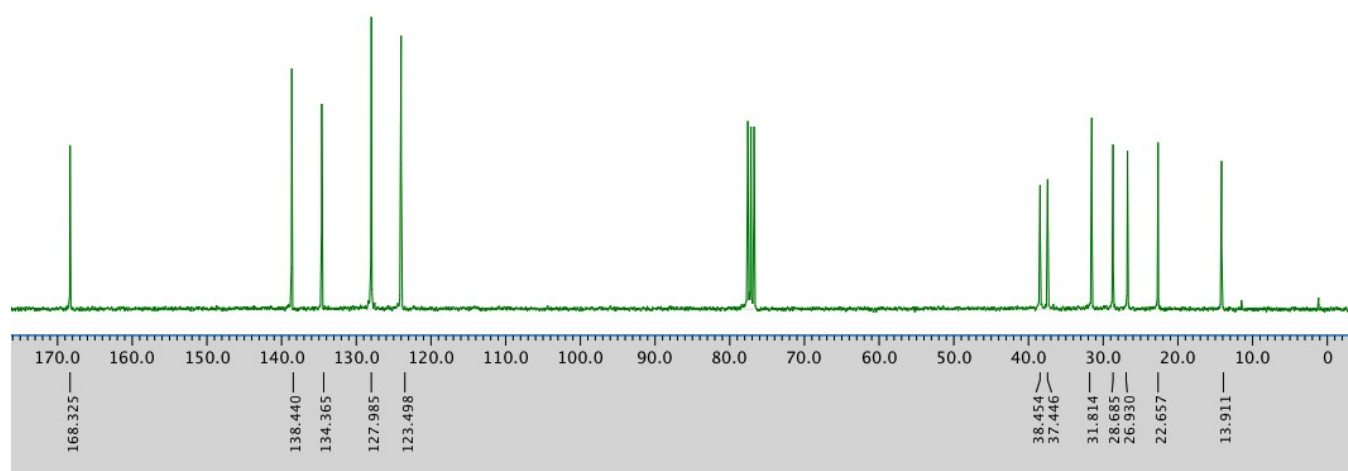

**Fig. S13.**  $^{13}\text{C}$  NMR spectrum of **3a** in  $\text{CDCl}_3$ .



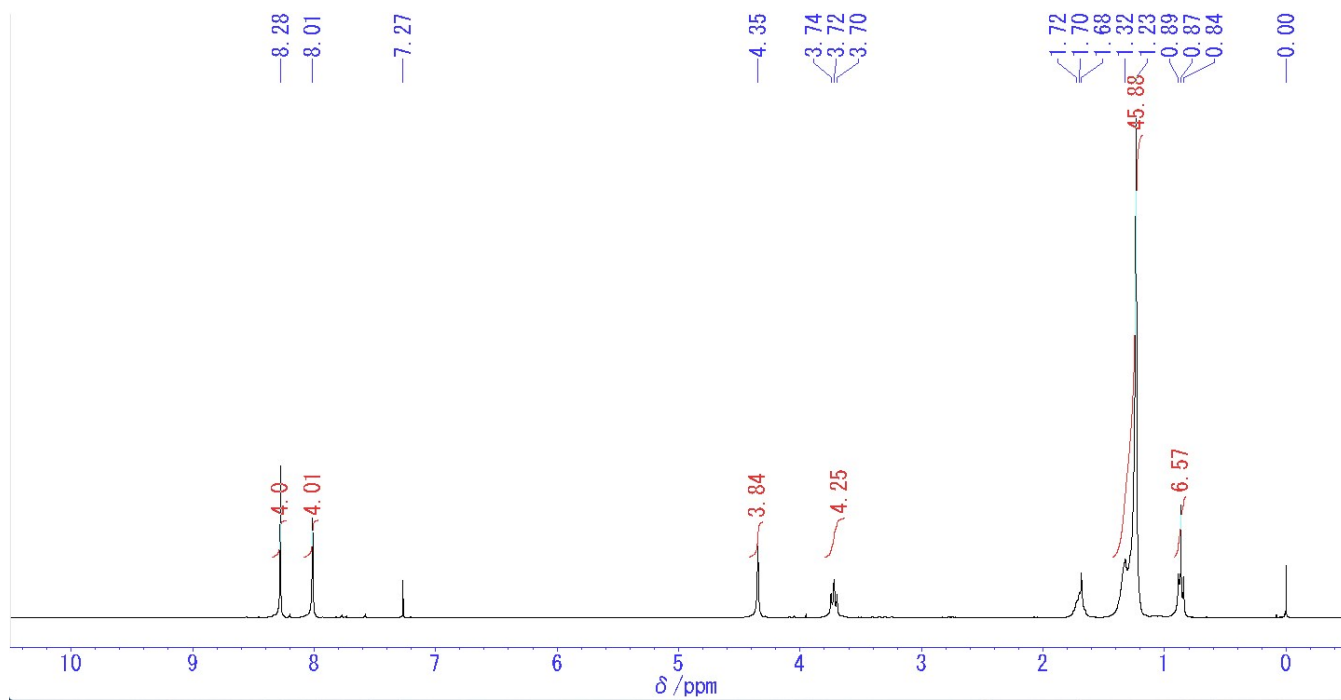

**Fig. S14.**  $^1\text{H}$  NMR spectrum of **3b** in  $\text{CDCl}_3$ .

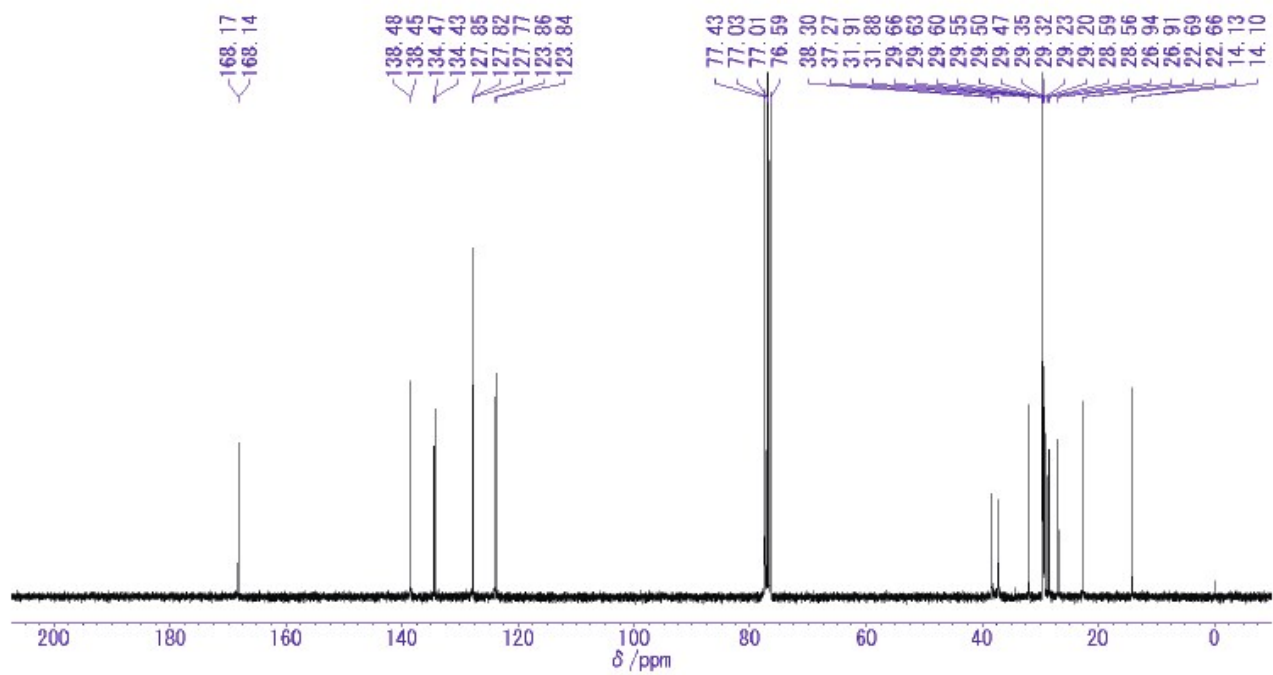

**Fig. S15.**  $^{13}\text{C}$  NMR spectrum of **3b** in  $\text{CDCl}_3$ .

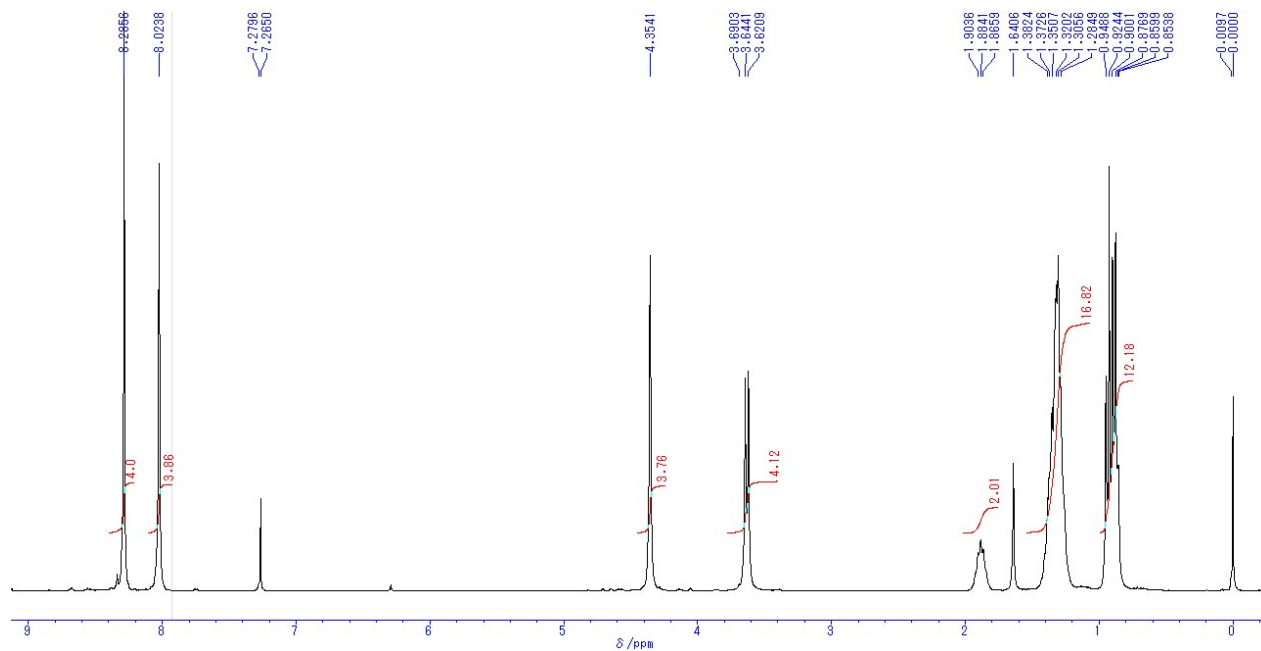

**Fig. S16.**  $^1\text{H}$  NMR spectrum of **3c** in  $\text{CDCl}_3$ .

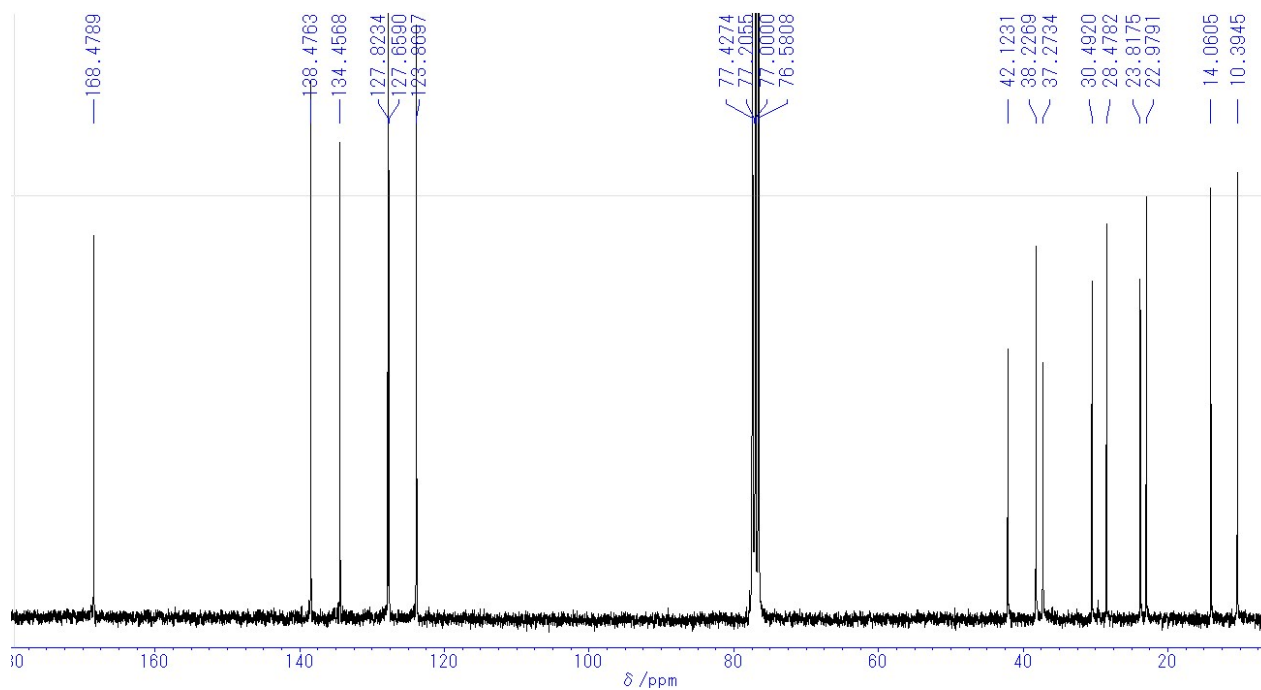

**Fig. S17.**  $^{13}\text{C}$  NMR spectrum of **3c** in  $\text{CDCl}_3$ .
